# Supplementary material for: Microfluidic routes to the controlled production of nanoparticlesElectronic supplementary information ESI available: image of the central portion of the micromixer chip. See http://www.rsc.org/suppdata/cc/b2/b202998g/
Source: Royal Society of Chemistry journal article supplement (doi:10.1039/b202998g), 2002-04-23
Supplement: b202998g.doc [file b202998g.doc]

# Supplementary Material (ESI) for Chemical Communications

# This journal is © The Royal Society of Chemistry 2002

## Image of microfabricated reaction device

**inlet**

**outlet**

Image of central portion of micromixer chip (volume 12nL, top layer shown). Two inlet flows (containing respectively sodium sulfide and cadmium nitrate) are split into 16 partial flows before bringing them into contact (at dotted line). After mixing the channels are then sequentially recombined in a reverse network until all partial flows are united in one broad outlet channel.
